# Intramolecular domain dynamics regulate synaptic MAGUK protein interactions

Nils Rademacher<sup>1,5</sup>, Benno Kuropka<sup>2</sup>, Stella-Amrei Kunde<sup>1</sup>, Markus C. Wahl<sup>3,4</sup>,  
Christian Freund<sup>2</sup> and Sarah A. Shoichet<sup>1,5</sup>

<sup>1</sup> Charité-Universitätsmedizin Berlin, Neurowissenschaftliches Forschungszentrum (NWFZ), Charitéplatz 1, 10117 Berlin, Germany

<sup>2</sup> Freie Universität Berlin, Institute of Chemistry and Biochemistry, Protein Biochemistry, Thielallee 63, 14195 Berlin, Germany

<sup>3</sup> Freie Universität Berlin, Institute of Chemistry and Biochemistry, Structural Biochemistry, Takustr. 6, 14195 Berlin, Germany

<sup>4</sup> Helmholtz-Zentrum Berlin für Materialien und Energie, Macromolecular Crystallography, D-12489 Berlin, Germany

<sup>5</sup> Corresponding Authors

## Abstract

PSD-95 MAGUK family scaffold proteins are multi-domain organisers of synaptic transmission that contain three PDZ domains followed by an SH3-GK domain tandem. This domain architecture allows coordinated assembly of protein complexes composed of neurotransmitter receptors, synaptic adhesion molecules, cytoskeletal proteins and downstream signalling effectors. Here we show that binding of monomeric PDZ<sub>3</sub> ligands to the third PDZ domain of PSD-95 induces functional changes in the intramolecular SH3-GK domain assembly that influence subsequent homotypic and heterotypic complex formation. We identify PSD-95 interactors that differentially bind to the SH3-GK domain tandem depending on its conformational state. Among these interactors we further establish the heterotrimeric G protein subunit Gnb5 as a PSD-95 complex partner at dendritic spines. The PSD-95 GK domain binds to Gnb5 and this interaction is triggered by PDZ<sub>3</sub> ligands binding to the third PDZ domain of PSD-95, unraveling a hierarchical binding mechanism of PSD-95 complex formation.

## 34 Introduction

35 Excitatory synapses are the contact sites through which neurons communicate which each  
36 other. These synapses are asymmetric structures that are formed by pre- and postsynaptic  
37 terminals containing distinct sets of proteins. Incoming action potentials are converted into  
38 chemical signals (neurotransmitters) at presynaptic terminals, which subsequently pass  
39 through the synaptic cleft and are reconverted into electrical signals at postsynaptic sites  
40 (Lisman et al., 2007). These synaptic contacts are not static but are able to undergo structural  
41 changes and thereby modify neuronal network computation (Nishiyama and Yasuda, 2015).  
42 At postsynaptic sites, interacting proteins are densely packed into a sub-membrane structure  
43 called the postsynaptic density (PSD) (Sheng and Hoogenraad, 2007). Scaffold proteins of the  
44 PSD-95 family membrane-associated guanylate kinases (MAGUKs) are highly abundant  
45 components of the PSD and function as central regulators of postsynaptic organisation (Zhu  
46 et al., 2016a). PSD-95 family MAGUKs contain three PDZ domains that are known to directly  
47 interact with N-methyl-D-aspartate (NMDA) and  $\alpha$ -amino-3-hydroxy-5-methyl-4-  
48 isoxazolepropionic acid (AMPA) receptor C-termini (Kornau et al., 1995; Leonard et al., 1998;  
49 Dakoju et al., 2003) followed by an SH3 - guanylate kinase (GK) domain tandem (Funke et al.,  
50 2005). The MAGUK SH3 domain lost its function to bind proline-rich peptides; instead it forms  
51 an intramolecular interaction with the GK domain (McGee et al., 2001). Similarly, the PSD-95  
52 GK domain is atypical in that it is unable to phosphorylate GMP but has evolved as a protein  
53 interaction domain (Johnston et al., 2011). Until now, binding of known interactors to the  
54 GK domain typically involves residues of the canonical GMP-binding region (Reese et al.,  
55 2007; Zhu et al., 2011; Zhu et al., 2016b). This modular array of protein interaction domains  
56 allows PSD-95 MAGUKs to function as bidirectional organisers of synaptic function. First,  
57 neurotransmitter receptors can be incorporated or removed from postsynaptic membranes,  
58 depending on molecular interactions with these sub-membrane scaffold proteins. Second,  
59 together with other scaffold proteins at postsynaptic sites, they align downstream effectors and  
60 cytoskeletal proteins. Accordingly, PSD-95 family MAGUKs are essential for the establishment  
61 of long-term potentiation (LTP) by regulating the content of AMPA receptors at dendritic spines  
62 (Ehrlich and Malinow, 2004; Opazo et al., 2012; Sheng et al., 2018). In line with this is the  
63 observation that acute knockdown of PSD-95 MAGUKs leads to a decrease in postsynaptic  
64 AMPA and NMDA receptor-mediated synaptic transmission as well as a reduction in PSD size  
65 (Chen et al., 2015). Taken together, exploring protein complex formation directed by PSD-95  
66 MAGUK family members is of central interest to understand synaptic regulation. We have  
67 previously shown that synaptic MAGUK proteins oligomerise upon binding of monomeric  
68 PDZ<sub>3</sub> ligands (ligands that specifically bind to the third PDZ domain) (Rademacher et al., 2013)  
69 and speculated that ligand - PDZ<sub>3</sub> domain binding induces conformational changes in the  
70 C-terminal domains that lead to complex formation. Our initial observations of

71 PDZ ligand-induced effects in MAGUK proteins have been recently supported by other studies  
72 (Zeng et al., 2016; Zeng et al., 2017).

73 In this study, we use a bimolecular fluorescence complementation (BiFC) assay to show that  
74 PSD-95 oligomerisation is triggered by PDZ<sub>3</sub> ligands and dependent on the C-terminal SH3-GK  
75 domain tandem. Moreover, we identify synaptic interaction partners of PSD-95 C-terminal  
76 domains by quantitative mass spectrometry and provide evidence that the heterotrimeric  
77 G protein subunit Gnb5 is a novel GK domain interactor and that its ability to bind to PSD-95  
78 is likewise promoted by ligand binding to the PSD-95 PDZ<sub>3</sub> domain.

79

## 80 **Results**

### 81 **Ligand binding to PSD-95 PDZ<sub>3</sub> domains facilitates oligomerisation guided by its** 82 **C-terminal module**

83 We are interested in the functional coupling of PDZ<sub>3</sub> domains with the adjacent SH3-GK  
84 domain tandem in the synaptic scaffold protein PSD-95 (PSG module, see **Figure 1A** for  
85 domain structure) and the relevance of ligand - PDZ<sub>3</sub> domain interactions on PSD-95 complex  
86 formation. To explore this idea, we built on our previous work with tagged cytosolic  
87 PDZ<sub>3</sub> ligands (Rademacher et al., 2013) and we have now designed a cell-based assay to  
88 directly monitor the proximity of PSD-95 molecules by bimolecular fluorescence  
89 complementation (BiFC). Expression constructs of PSD-95 were fused to non-fluorescent  
90 halves of EYFP (N-terminal half = YN and C-terminal half = YC) and coexpressed with the  
91 established PDZ domain ligand Neuroligin-1 (NLGN1) in HEK cells. NLGN1 is a synaptic  
92 adhesion molecule that specifically binds to the third PDZ domain of PSD-95 (Irie et al., 1997).  
93 Coexpression of the per se non-fluorescent PSD-95-YN and PSD-95-YC constructs (together  
94 referred to as WT/WTsplitEYFP) with full-length NLGN1 led to the formation of fluorescent  
95 PSD-95 complexes that were located at the cell membrane, recapitulating the natural  
96 localisation of the endogenous protein complexes (**Figure 1B**). Next, we quantified the  
97 formation of fluorescent complexes by flow cytometry (**Figure 1C**). Interestingly, upon  
98 coexpression of mutant NLGN1 constructs that carry two alanine substitutions within the  
99 C-terminal PDZ<sub>3</sub> ligand sequence (mutNLGN1: C-terminus TTRV ► **TARA**), the detected  
100 fluorescence intensity decreased by approximately 40% (**Figure 1C**). Fluorescent signals were  
101 nearly undetectable following coexpression of PSD-95-YC with the scaffold-incompetent  
102 PSD-95 point mutant PSD-95-YN L460P, together with either NLGN1 or mutNLGN1 (**Figure**  
103 **1C**). Leucine 460 is an internal SH3 domain residue and the L460P mutation has been shown  
104 to specifically disrupt the intramolecular SH3-GK domain interaction (**Supplemental Figure 1**)  
105 (McGee and Bredt, 1999; Shin et al., 2000) that is one of the hallmark features of MAGUK

106 proteins (Tavares et al., 2001). Interestingly, this amino acid exchange does not interfere with  
107 PDZ<sub>3</sub> ligand binding (Rademacher et al., 2013) but strongly abolishes PSD-95 complex  
108 assembly (**Figure 1C**). We assume that in the context of the full-length protein, the L460P  
109 mutation likewise weakens the (intramolecular) interaction between the SH3 and GK domain,  
110 which would then result in a constitutively 'open' conformation. This profound negative effect  
111 that we observe following a targeted amino acid exchange in the SH3 domain highlights the  
112 importance of the SH3-GK domain tandem for its involvement in regulated PSD-95  
113 oligomerisation.

114

115 **Ligand binding to PSD-95 PDZ<sub>3</sub> facilitates an 'open' SH3-GK state that frees both**  
116 **domains for binding in *trans***

117 In line with our BiFC assay results, we have previously reported that PSD-95 constructs (full-  
118 length and PSG module), efficiently oligomerise and coprecipitate upon binding of a  
119 PDZ<sub>3</sub> ligand (Rademacher et al., 2013). Moreover, the observation by NMR spectroscopy that  
120 the PSG module forms a dynamic modular entity (Zhang et al., 2013) led us to hypothesise  
121 that ligand binding to PDZ<sub>3</sub> might influence intramolecular SH3-GK domain assembly,  
122 facilitating the formation of domain swapped oligomers (McGee et al., 2001; Ye et al., 2018).  
123 Specifically, we asked whether the ligand - PDZ<sub>3</sub> domain interaction might release the  
124 intramolecular SH3-GK domain assembly, thereby allowing other domains and proteins to  
125 interact in *trans*. To explore this idea, we assessed which PSD-95 domains are able to interact  
126 in *trans* upon PDZ<sub>3</sub> ligand binding to proteins that harbour the PSG module, using a  
127 coimmunoprecipitation experiment designed accordingly. We expressed the PSG module  
128 together with PDZ<sub>3</sub> ligand constructs consisting of the last 10 amino acids (DTKNYKQTSV) of  
129 the established PDZ<sub>3</sub> binder CRIPT (Niethammer et al., 1998) fused to the monomeric red  
130 fluorescent protein mCherry (referred to as 'PDZ<sub>3</sub> ligand'). As a control, we coexpressed similar  
131 constructs carrying two amino acid exchanges within the PDZ<sub>3</sub> ligand sequence  
132 (DTKNYKQ**ASA**, referred to as 'mutPDZ<sub>3</sub> ligand'). Upon triple transfection with either a GK or  
133 an SH3-GK domain construct, the PSG modules were precipitated, and copurified proteins  
134 were analysed by western blot (**Figure 1D**). The SH3-GK construct did not coprecipitate with  
135 the PSG module regardless of whether it was coexpressed with wild-type or mutant  
136 PDZ<sub>3</sub> ligands. This may be due to a constitutive intramolecular association of the SH3 and  
137 GK domains, leading to a 'closed' SH3-GK assembly, with no ability to bind a PSG module in  
138 *trans*. The GK domain alone, however, coprecipitated effectively with the PSG module, when  
139 expressed in the presence of functional PDZ<sub>3</sub> ligands. These data suggest that binding of a  
140 PDZ<sub>3</sub> ligand renders the PSG module 'interaction-competent', *i.e.* it facilitates formation of a  
141 conformational state in which it is able to bind isolated GK domain constructs in *trans*. In this

142 experiment, the intramolecular SH3-GK domain assembly resembles the ‘interaction-  
143 incompetent’ state, and the SH3 domain autoinhibits the GK domain’s interaction activity.

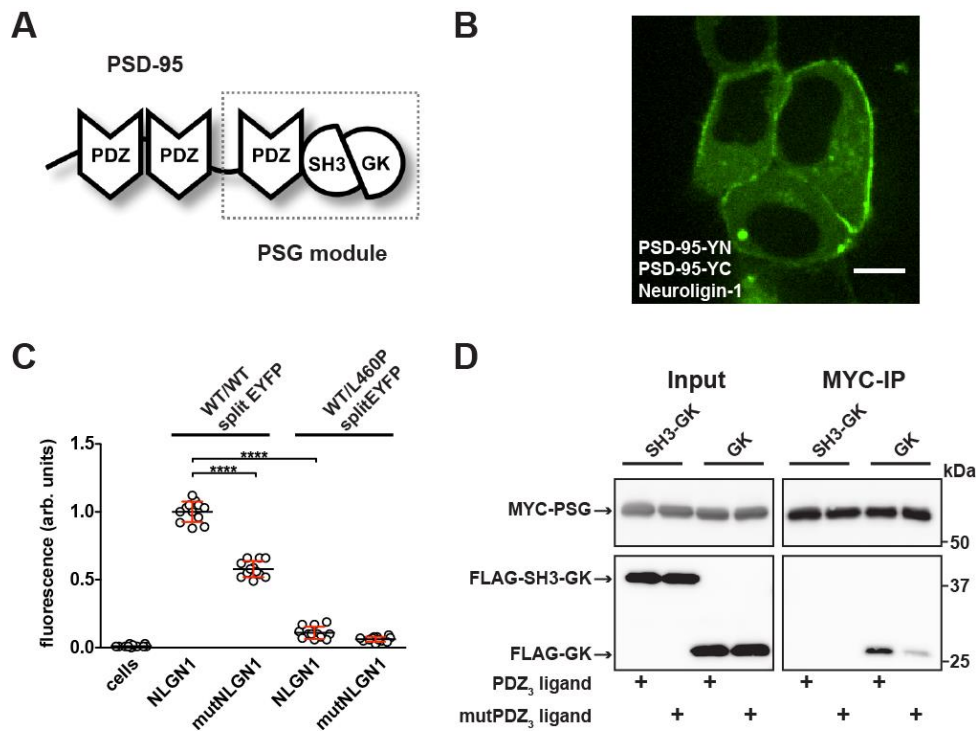

144

145 **Figure 1. PDZ<sub>3</sub> ligand-induced dynamics in the PDZ<sub>3</sub>-SH3-GK module facilitate**  
146 **oligomerisation**

147 **A)** Schematic representation of the PSD-95 domain organisation. PSD-95 contains three PDZ  
148 domains followed by a SH3-GK domain tandem. The PSG module (PDZ<sub>3</sub>-SH3-GK) is common  
149 to the MAGUK protein family.

150 **B)** Live-cell microscopy of HEK-293T cells transfected with PSD-95-YN, PSD-95-YC and  
151 NLGN1 reveals a membrane associated localisation of the refolded complex (transfection  
152 corresponding to WT/WTsplitEYFP plus NLGN1 in Figure 1C). Scale bar: 10 µm.

153 **C)** PSD-95 oligomerisation assay based on BiFC. HEK-293T cells were triple-transfected with  
154 the displayed DNA constructs and EYFP refolding was assessed by flow cytometry. Formation  
155 of oligomeric fluorescent complexes is effective in the presence of wild-type Neuroigin-1  
156 (NLGN1). Fluorescence is reduced by either site-directed mutagenesis of the NLGN1 PDZ<sub>3</sub>  
157 ligand C- terminus (mutNLGN1: TTRV ► TARA), or a targeted amino acid exchange in the  
158 PSD-95 SH3 domain (L460P). The dot plot indicates mean values (black horizontal bar) with  
159 SD (red vertical bar), based on twelve individual measurements (dots) that originate from four  
160 independent experiments (results from each experiment are triplicates for each DNA construct  
161 combination). Data was analysed by one-way ANOVA / Sidak's multiple comparisons test.  
162 \*\*\*\*p < 0.0001.

163 **D)** MYC-PSG and FLAG-SH3-GK or FLAG-GK were coexpressed together with either PDZ<sub>3</sub>  
164 ligand or mutPDZ<sub>3</sub> ligand constructs. Upon MYC-PSG IP, proteins were analysed by western  
165 blot with αFLAG antibodies. Coexpression of the PDZ<sub>3</sub> ligand enhanced the colP of PSG and  
166 GK, whereas colP of PSG and SH3-GK was negligible regardless of whether or not the PDZ<sub>3</sub>  
167 ligand construct was coexpressed.

168 The following source data is available for this figure:

169 **Source data 1.** Source data for **Figure 1C**.

170

### 171 **The SH3-GK assembly state influences PSD-95 interactions with synaptic proteins**

172 Based on the above results, we propose that PSD-95 C-termini can adopt different functional  
173 states depending on whether or not PDZ<sub>3</sub> ligands are bound to PSD-95 PDZ<sub>3</sub> domains, *i.e.*  
174 that ligand binding induces a loosening of the intramolecular SH3-GK domain assembly and  
175 renders the SH3-GK domain tandem 'interaction-competent'. In order to identify interactors  
176 that differentially bind to PSD-95 C-termini in an 'open state' versus PSD-95 molecules where  
177 the GK domain is autoinhibited by an intramolecular interaction with the adjacent SH3 domain,  
178 we utilised a quantitative proteomics strategy. In a reductionist approach, we mimic the open  
179 and closed states with different bacterially expressed GST fusion proteins: a GST-GK  
180 construct serves as the 'interaction-competent' GK domain state, whereas a GST-SH3-GK  
181 domain fusion protein reflects the autoinhibited domain assembly. By performing GST pull-  
182 downs from crude synaptosome preparations followed by quantitative mass spectrometric  
183 analysis we aimed to identify novel proteins that preferentially bind to the 'open' or 'closed'  
184 state of the PSD-95 C-terminal domains (**Figure 2A**).

185 Bacterially expressed GST-GK vs. GST-SH3-GK constructs were incubated with crude  
186 synaptosome preparations of whole rat brains in triplicates. Interacting proteins were eluted  
187 from the beads and separated by SDS-PAGE. Enzymatic <sup>16</sup>O/<sup>18</sup>O-labelling during tryptic in-gel  
188 digestion was used for relative quantification of proteins by nanoLC-MS/MS analysis. Proteins  
189 enriched by GST-GK were labelled light (<sup>16</sup>O), while proteins enriched by GST-SH3-GK were  
190 labeled heavy (<sup>18</sup>O). In total, we reproducibly identified and quantified 278 proteins  
191 (**Supplemental Table 1**). Remarkably, 208 (≈ 75%) of these have been recently reported to  
192 be present in postsynaptic density fractions isolated from prefrontal cortex (Wilkinson et al.,  
193 2017). Moreover, we also identified the known GK-domain interacting proteins Map1A (Reese  
194 et al., 2007), Mark2 (Wu et al., 2012), Dlgap2 (Takeuchi et al., 1997) and Srcin1/p140CAP  
195 (Fossati et al., 2015), validating the general success of our approach. Potential binders to the  
196 GST-GK construct are expected to be enriched in their light form (L/H ratio > 1), while binders

197 to the GST-SH3-GK construct are expected to be enriched in their heavy form (L/H ratio <1).  
198 Unexpectedly, we isolated several heterotrimeric G protein subunits enriched in the protein  
199 fractions that bind preferentially to the GST-GK construct (**Figure 2B**). Of special interest was  
200 the guanine nucleotide binding protein beta 5 (Gnb5), which is a signalling effector downstream  
201 of GPCRs that exhibits inhibitory activity in neurons (Xie et al., 2010; Ostrovskaya et al., 2014).  
202 Gnb5 contains an N-terminal  $\alpha$ -helix followed by a  $\beta$ -sheet propeller composed of seven  
203 WD-40 repeats (Cheever et al., 2008). Gnb5 is specifically expressed in brain (Watson et al.,  
204 1994) and mutations in the Gnb5 gene cause a multisystem syndrome with intellectual  
205 disability in patients (Lodder et al., 2016).

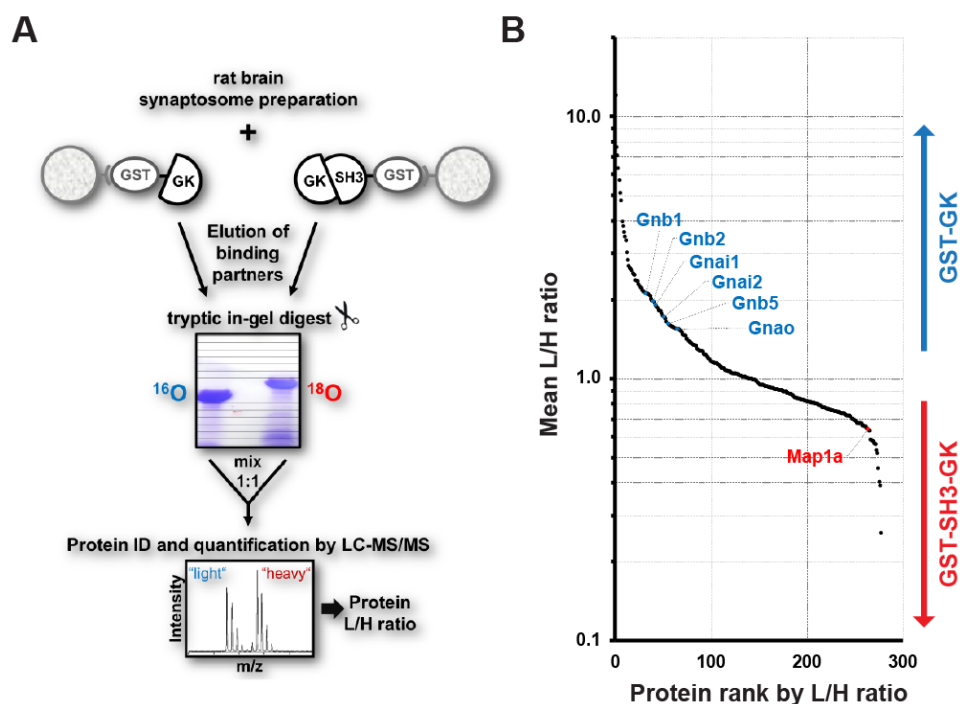

206

207 **Figure 2. Identification of interactors that differentially bind to PSD-95 C-terminal**  
208 **domains**

209 **A)** Schematic representation of the quantitative mass spectrometry experiment to identify  
210 PSD-95 GK domain interactors from rat synaptosomes by GST pull-down of bacterially  
211 expressed GST-GK or GST-SH3-GK constructs and  $^{18}\text{O}$ -labeling.

212 **B)** GST pull-downs were performed in triplicates and 278 interacting proteins that passed our  
213 threshold settings were identified and quantified by mass spectrometry. Proteins are ranked  
214 by their mean L/H ratio indicating preferential enrichment with either GST-GK or GST-SH3-GK  
215 constructs. The heterotrimeric G protein subunit Gnb5 was found to be enriched in the GST-  
216 GK fraction relative to the GST-SH3 GK fraction and selected for further studies.

217 The following figure supplement is available:

218 **Supplemental Table 1.** Source data and supplement for **Figure 2B**.

219

### 220 **Gnb5 is a novel synaptic PSD-95 complex partner**

221 In order to verify Gnb5 as a potential binding partner from the above mass spectrometry result,  
222 we performed a GST pull-down from crude rat brain synaptosomes and analysed the  
223 associated proteins by western blot (**Figure 3A**). We could not detect Gnb5 in the bead control  
224 pull-down lane and almost no Gnb5 was detectable in the GST-SH3-GK lane. However, a clear  
225 Gnb5 signal was present in the GST-GK lane, supporting our quantitative mass spectrometry  
226 results and suggesting that a Gnb5 - GK domain interaction is favoured over a Gnb5 - SH3-GK  
227 domain interaction. Additionally, we observed a preferred interaction of overexpressed Gnb5  
228 with the isolated GK domain compared to SH3-GK domain constructs in COS-7 cells. Upon IP  
229 of Gnb5 tagged with the green fluorescent protein Clover (Lam et al., 2012) with  $\alpha$ GFP  
230 antibodies, the GK domain construct coprecipitates far more efficiently than does the SH3-GK  
231 domain (**Figure 3B**).

232 Our *in vitro* experiments clearly indicate that Gnb5 is an interactor of PSD-95 C-terminal  
233 domains. However, our interaction data do not clearly indicate in which subcellular  
234 compartment Gnb5 and the Gnb5 - PSD-95 complex is located. To explore this, we  
235 immunostained cultures of dissociated cells from rat hippocampi and analysed the subcellular  
236 distribution of endogenous proteins. We stained fixed cultures (DIV21) with antibodies against  
237 Gnb5 and costained for the dendritic marker MAP2 and PSD-95. Gnb5 staining was present  
238 in neuronal dendrites, where the signal overlaps with the PSD-95 staining (**Figure 3C**).  
239 Additionally, we stained neurons with antibodies against Gnb5, MAP2 and the presynaptic  
240 marker Synapsin. In these experiments, the Gnb5 signal is adjacent to the presynaptic  
241 Synapsin signal (**Figure 3C**). Together, these findings strongly support the idea that Gnb5 and  
242 PSD-95 are protein complex partners at postsynaptic sites of hippocampal neurons.



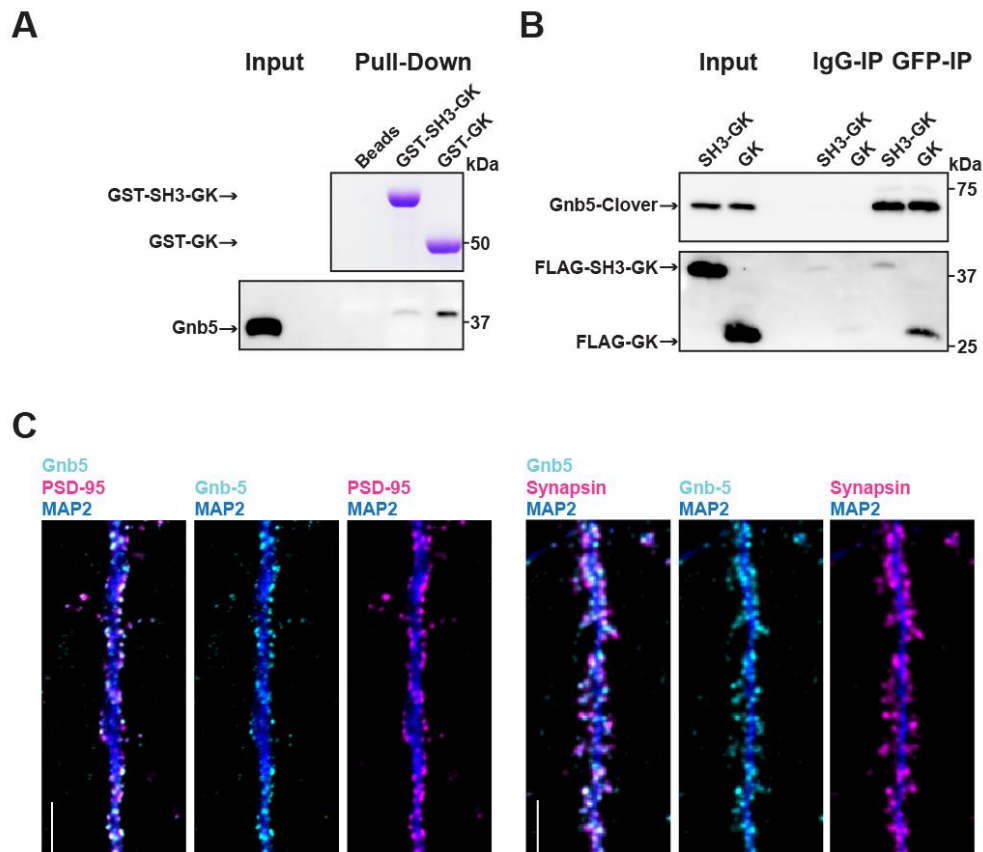

243

244 **Figure 3. The heterotrimeric G protein subunit Gnb5 is a novel PSD-95 interactor**

245 **A**) GST pull-down from crude synaptosomal proteins (comparable amounts of GST tagged  
246 proteins observable by Coomassie, upper panel) enabled comparison of Gnb5 binding to the  
247 GK domain alone versus the SH3-GK domain. Gnb5 is effectively enriched in the GST-GK  
248 pull-down compared to bead controls or GST-SH3-GK pull-downs, as observed by western  
249 blot with a commercially available  $\alpha$ Gnb5 antibody (lower panel).

250 **B**) CoIP experiment of tagged Gnb5 (Gnb5-Clover) with tagged SH3-GK or GK (FLAG-SH3-  
251 GK or FLAG-GK). Immunoprecipitation of Gnb5-Clover with  $\alpha$ GFP antibody efficiently  
252 copurified the GK-domain construct (observed via western blot with  $\alpha$ FLAG antibodies, lower  
253 panel).

254 **C**) Cultures of rat hippocampal neurons (E18) were fixed at DIV21 and stained for Gnb5  
255 together with the dendritic marker MAP2 (microtubule-associated protein 2) and either the  
256 postsynaptic protein PSD-95 (left panel) or the presynaptic marker Synapsin (right panel) and  
257 respective fluorescent secondary antibodies, and visualised by confocal microscopy. Scale  
258 bars: 5  $\mu$ m.

259

## 260 Regulation of PSD-95 complex formation

261 Our data indicate that Gnb5 interacts differentially with PSD-95 C-terminal constructs and we  
262 observe that PSD-95 and Gnb5 exhibit overlapping expression exclusively at postsynaptic  
263 sites. We next set out to determine if the PSD-95 - Gnb5 interaction is indeed influenced by  
264 the presence of synaptic PDZ<sub>3</sub> ligands, as we initially hypothesised. We coexpressed PSD-95  
265 with PDZ<sub>3</sub> ligand constructs as in previous experiments, together with Gnb5. Following IP of  
266 PSD-95, the precipitates were analysed by western blot: the presence of PDZ<sub>3</sub> ligands indeed  
267 triggered coimmunoprecipitation of Gnb5 and PSD-95, which supports the idea that ligand  
268 binding to PDZ<sub>3</sub> indirectly affects protein-protein interactions at neighbouring domains. Gnb5  
269 lacking the N-terminal  $\alpha$ -helix (shortGnb5) coprecipitated somewhat less efficiently than the  
270 full-length protein (**Figure 4A**), suggesting that this N-terminal region of Gnb5 (amino acids  
271 1-33) is important for the PDZ<sub>3</sub> ligand-mediated interaction with PSD-95.

272 Next, we asked if the PSD-95 PSG module is sufficient to bind to Gnb5 in a ligand-triggered  
273 mode. We coexpressed a PSG expression construct together with Gnb5 and PDZ<sub>3</sub> ligand  
274 constructs (wild-type or mutant) and performed pull-downs of the PSG constructs or unspecific  
275 IgGs as a control. Upon analysis of the precipitates by western blot, we detected a robust coIP  
276 of Gnb5 with the PSG module construct in the presence of PDZ<sub>3</sub> ligands (**Figure 4B**). Clearly,  
277 the PSG module is sufficient for ligand-triggered coimmunoprecipitation of Gnb5.

278 Our comparative mass spectrometry results for Gnb5, together with subsequent PSD-95  
279 coimmunoprecipitation data, support the idea that ligand binding influences the PSD-95 PSG  
280 module such that its protein interaction profile resembles that of the isolated GK domain, *i.e.* it  
281 differs from the SH3-GK domain tandem with regard to protein-protein interactions (see **Figure**  
282 **1D**). In summary, we propose that binding of a PDZ<sub>3</sub> ligand weakens the intramolecular  
283 SH3-GK domain association, which then enables the individual SH3 and GK domains to  
284 participate in *trans* interactions with other molecules. To test this model, we took advantage of  
285 the L460P mutation, which is known to disrupt the well-characterised intramolecular SH3-GK  
286 domain assembly, thus aberrantly releasing the GK domain from its SH3 domain-mediated  
287 inhibition. Upon coexpression of wild-type or PSG L460P proteins together with Gnb5, we  
288 performed pull-downs of the PSG proteins and comparatively assessed coprecipitation of  
289 Gnb5. Gnb5 did not coprecipitate efficiently with the wild-type PSG module but was effectively  
290 coprecipitated by the PSG module harbouring the L460P mutation that disrupts the  
291 intramolecular SH3-GK domain interaction (**Figure 4C**). We conclude that Gnb5 is interacting  
292 with the PSD-95 PSG module in one of two possible modes. Gnb5 could bind at GK domain  
293 sites that are directly occupied by the neighbouring SH3 domain (and thereby compete with  
294 the SH3 domain for interaction with the GK domain). Alternatively, Gnb5 could bind to  
295 GK domain sites on distant surfaces (e.g. the canonical GMP-binding region) that are not

296 directly influenced by intramolecular SH3-GK interactions but might be allosterically regulated  
 297 by changes to the PSG module.

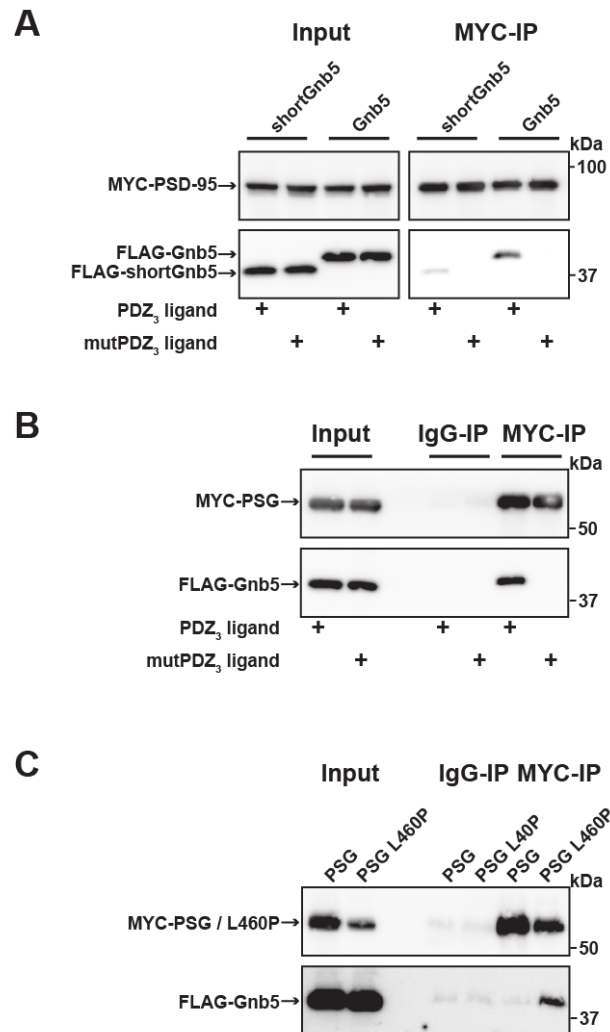

298

299 **Figure 4. Gnb5 - PSD-95 complex formation is regulated by PDZ<sub>3</sub> ligand binding**

300 **A)** MYC-PSD-95 and FLAG-Gnb5 or FLAG-shortGnb5 were coexpressed with either PDZ<sub>3</sub>  
 301 ligand or mutPDZ<sub>3</sub> ligand constructs. MYC-PSD-95 was precipitated and proteins were  
 302 analysed by western blot with αFLAG antibodies. Coexpression of the PDZ<sub>3</sub> ligand facilitated  
 303 the coIP of PSD-95 and Gnb5, coIP with the shortGnb5 construct (N-terminal truncation) was  
 304 much less efficient. In the presence of the mutPDZ<sub>3</sub> ligand, coprecipitated proteins were not  
 305 detectable.

306 **B)** CoIP of MYC-PSG and Flag-Gnb5 together with either PDZ<sub>3</sub> ligand or mutPDZ<sub>3</sub> ligand  
 307 constructs. The presence of PDZ<sub>3</sub> ligand constructs facilitated coprecipitation of PSG and  
 308 Gnb5 (see comparative western blot with αFLAG antibodies, lower panel).

309 **C)** Coexpression of MYC-PSG or MYC-PSG L460P with FLAG-Gnb5 and subsequent MYC  
 310 IP. PSG L460P IP efficiently copurifies Gnb5 (observed by western blot with αFLAG  
 311 antibodies).

312

### 313 **PSD-95 interactors occupy different GK subdomains**

314 In order to explore these two possibilities in more depth, we took advantage of established  
315 knowledge on the structure of GK domains and information on previously identified  
316 GK-interacting proteins. The GK domain of PSD-95 has evolved from an enzyme that catalyses  
317 the phosphorylation of GMP to an enzymatically inactive protein interaction domain.  
318 Interestingly, various PSD-95 GK-interacting proteins bind to the canonical GMP-binding  
319 region, and by exchanging arginine 568 (which is situated in the ancestral GMP-binding site)  
320 to alanine (R568A), these interactions can be specifically disrupted (Reese et al., 2007). In  
321 order to gain insight into the nature of the binding of Gnb5 to the PSD-95 GK domain, we  
322 compared PSD-95 - Gnb5 binding to PSD-95 - GKAP binding. GKAP ('GK'-associated protein,  
323 also referred to as SAPAP1 or DLGAP1) is an established synaptic GK domain binder (Kim et  
324 al., 1997) whose interaction involves the GMP-binding region (Zhu et al., 2017). These ideas  
325 are also validated by our own coimmunoprecipitation experiments: GKAP can be efficiently  
326 coprecipitated upon pull-down of either the isolated GK domain or an intact PSG module,  
327 whereas a recombinant PSG module harbouring the GMP binding site mutation R568A fails to  
328 precipitate GKAP (**Figure 5A**). In experiments with PSD-95 and Gnb5, however, the same  
329 mutation had no effect on coprecipitation of Gnb5 (**Figure 5B**), suggesting that GKAP and  
330 Gnb5 proteins bind to PSD-95 GK domains in fundamentally different ways.

331 We next tested whether the GKAP - PSD-95 association could be influenced by PDZ<sub>3</sub> ligands  
332 that bind to PSD-95, as we observed previously for Gnb5 (see **Figure 4A, 4B and 5B**). The  
333 presence of PDZ<sub>3</sub> ligands did not influence the GKAP interaction: PSD-95 binds GKAP  
334 regardless of whether wild-type or mutant PDZ<sub>3</sub> ligands were present (**Figure 5C**). These data  
335 provide further evidence that the GKAP - GK domain binding mode differs substantially from  
336 the Gnb5 - GK interaction mode.

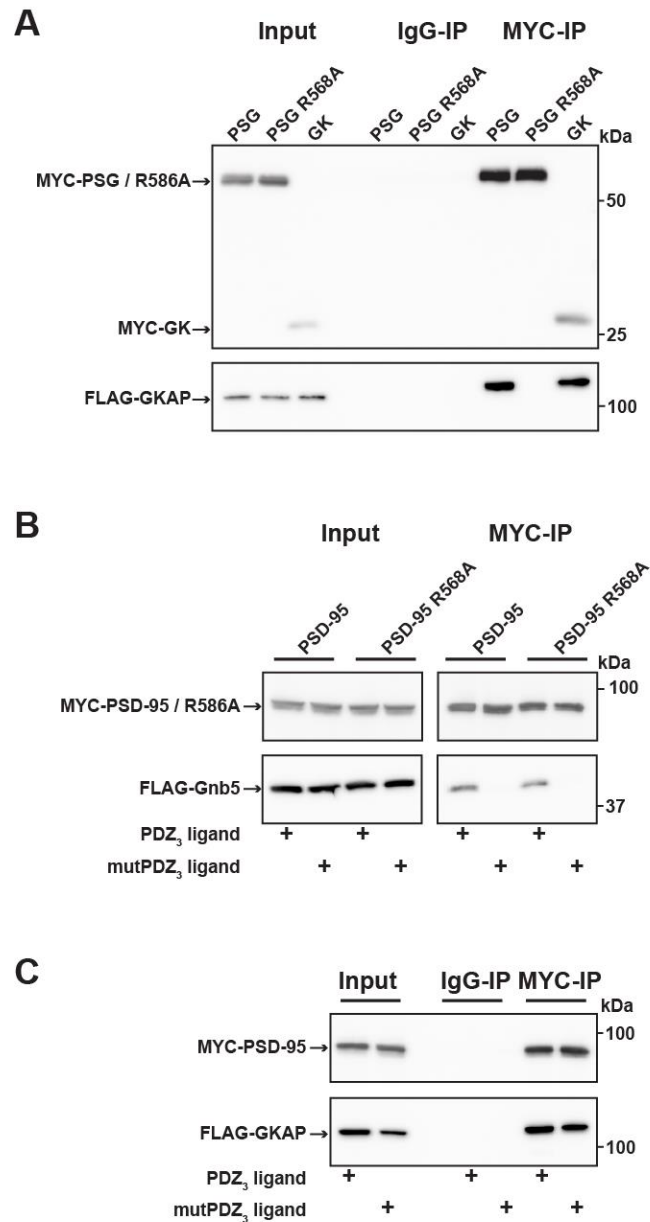

337

338 **Figure 5. PSD-95 interactors occupy different protein surfaces**

339 **A)** MYC-PSG, MYC-PSG R568A and MYC-GK were coexpressed with FLAG-GKAP.  
340 Following MYC IP, precipitated proteins were analysed by western blot. GKAP coprecipitated  
341 with PSG and GK domain constructs. The GK domain mutant PSG R568A was not able to  
342 bind GKAP.

343 **B)** CoIP of MYC-PSD-95 and FLAG-GKAP together with either PDZ<sub>3</sub> ligand or mutPDZ<sub>3</sub> ligand  
344 constructs and analysis of precipitated proteins by western blot with antibodies to the  
345 corresponding tags. The presence of PDZ<sub>3</sub> ligands in the lysate had no effect on PSD-95 GKAP  
346 interaction.

347 **C)** Following coexpression of MYC-PSD-95 or MYC-PSD-95 R568A with FLAG-Gnb5,  
348 together with either PDZ<sub>3</sub> ligand or mutPDZ<sub>3</sub> ligand, proteins were precipitated with αMYC-  
349 antibody and analysed by western blot. Gnb5 coIP with either PSD-95 or PSD-95 R568A was  
350 efficiently promoted by the presence of PDZ<sub>3</sub>-binding ligand, irrespective of the GK domain  
351 mutation R568A.

352

353 Importantly, our data support a model in which ligand binding to PDZ<sub>3</sub> results in a  
354 conformational change of the 'resting' intramolecular SH3-GK interaction that is common to  
355 MAGUK proteins. This conformational alteration is reflected by a change in the availability of  
356 specific GK surfaces for protein-protein interactions (**Figure 6A**). In the resting state, it is  
357 predominantly the external GK surface harbouring the classical GMP binding site that is  
358 available for protein-protein interaction such as those with the well-known PSD-95 interactors  
359 GKAP and MAP1a. However, upon ligand binding, other GK surfaces become accessible for  
360 protein-protein interactions. A subset of synaptic GK interacting proteins – in particular Gnb5,  
361 and perhaps other proteins enriched in our pool of interacting proteins that bind preferentially  
362 to GK rather than to SH3-GK – bind to these surfaces of the GK domain (**Figure 6B**).

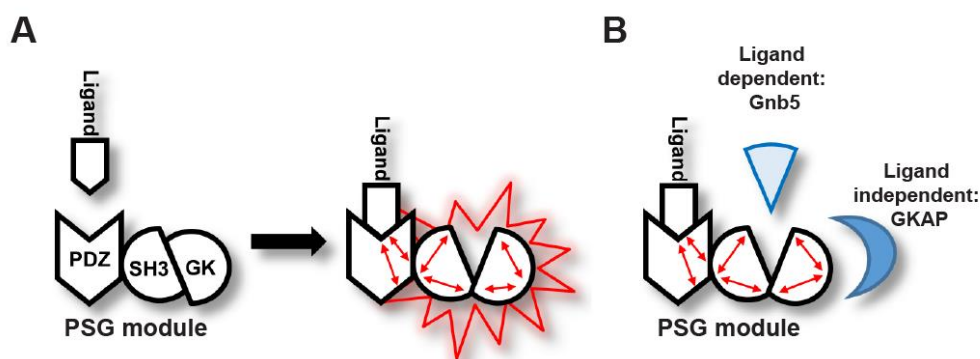

363

## 364 **Figure 6. Graphical Summary**

365 **A)** PSD-95 C-terminal domains (PSG module) functionally cooperate and regulate homotypic  
366 and heterotypic complex formation. We propose that PDZ<sub>3</sub> ligand binding to the PDZ<sub>3</sub> domain  
367 induces a loosening of the intramolecular SH3-GK interaction. This 'open' conformation is then  
368 able to initiate subsequent oligomerisation and protein binding.

369 **B)** Model of PDZ<sub>3</sub> ligand-dependent and ligand-independent binding to the PSD-95 C terminal  
370 SH3-GK domain tandem. Ligand - PDZ<sub>3</sub> domain binding facilitates association with Gnb5.

## 371 **Discussion**

372 The molecular basis for the dynamic regulation of synaptic transmission is dependent on the  
373 assembly and disassembly of protein complexes. It has been observed that activation of  
374 glutamate receptors is sufficient to specifically remodel postsynaptic protein-protein  
375 interactions (Lautz et al., 2018). In line with this finding is that upon LTP induction, various  
376 proteins undergo post-translational modifications and are incorporated into dense protein  
377 complexes at the postsynaptic compartment (Yokoi et al., 2012). It is well established that  
378 these activity-dependent changes in synaptic protein networks depend on phosphorylation  
379 (Opazo et al., 2010; Araki et al., 2015; Li et al., 2016) and other post-translational modifications,  
380 such as palmitoylation (El-Husseini Ael et al., 2002; Fukata et al., 2013). Recently it has been  
381 reported that the minimal requirement for the expression of LTP is the interaction of glutamate  
382 receptor auxiliary subunits with postsynaptic PSD-95. In that study, the interaction of different  
383 PDZ ligand C-termini with PSD-95 triggered a common molecular mechanism necessary for  
384 LTP induction downstream of glutamate receptors (Sheng et al., 2018).

385 In this study, we focussed on the postsynaptic scaffold protein PSD-95, which plays a central  
386 role in activity-dependent synapse regulation (Ehrlich et al., 2007). It is established that protein  
387 complex formation guided by PSD-95 PDZ and GK domains can be reversibly regulated by  
388 phosphorylation (Sumioka et al., 2010; Zhu et al., 2017), and at postsynaptic membranes,  
389 various PDZ ligand C-termini of multimeric receptor complexes are available to form  
390 multivalent interactions with scaffold proteins (Schwenk et al., 2012). Importantly, in a previous  
391 study it was also shown that binding of a SynGAP-derived PDZ ligand peptide was sufficient  
392 to induce PSD-95 PSG construct dimerisation (Zeng et al., 2016), but the underlying  
393 mechanism remained unresolved. Here, we show that PSD-95 oligomerisation can be induced  
394 by binding of monomeric PDZ<sub>3</sub> ligands, which then leads to conformational changes in the  
395 adjacent C-terminal SH3-GK domain structure.

396 Moreover, we identify synaptic interactors whose association with PSD-95 is likewise  
397 influenced by the conformational state of the PSD-95 C-terminus. Among these proteins, we  
398 focussed further on Gnb5, which is part of a protein complex that acts downstream of  
399 GABA<sub>B</sub> receptors and also modulates GIRK channel gating properties (Ostrovskaya et al.,  
400 2014). Our data indicate that the Gnb5 - PSD-95 interaction is positively regulated by ligand  
401 binding to the third PDZ domain of PSD-95. In order to understand how this occurs, it is  
402 important to note that in MAGUK scaffold proteins, the SH3 and GK domains interact directly,  
403 and together they form a unique structure that sets them apart from SH3 and GK domains  
404 found independently in other protein families (Tavares et al., 2001). Indeed, PSD-95 SH3 and  
405 GK domains, when expressed independently, bind each other efficiently. Likewise, in line with  
406 this structural model, mutations that disrupt the interface where these two domains contact

407 each other can have detrimental effects on protein function (McGee and Brecht, 1999; Shin et  
408 al., 2000). Also relevant is the fact that the SH3 domain has been reported to be an allosteric  
409 regulator or inhibitor of GK domain binding function, not only by direct contact with the adjacent  
410 GK surface but also by regulating the conformation of distant GK domain surfaces (Marcette  
411 et al., 2009). It is possible that binding of a ligand to the PSD-95 PDZ<sub>3</sub> domain influences  
412 precisely this function of the neighbouring SH3 domain and thus indirectly regulates  
413 GK interactions at distant sites. Alternatively, it is conceivable that regulation via PDZ<sub>3</sub> ligand  
414 binding results in a conformational change that loosens the natural SH3-GK structure, thereby  
415 freeing up the SH3-interacting surface of the GK domain for other protein-protein interactions.  
416 Nevertheless, in both possible scenarios, binding of a ligand to the adjacent PDZ<sub>3</sub> domain  
417 would release the GK domain from its regulation by the interacting SH3 domain. In order to  
418 explore these two possibilities, we took advantage of the established GK interactor GKAP and  
419 we compared Gnb5 and GKAP with regard to PSD-95 binding. By introducing a mutation  
420 (R568A) in the canonical GMP-binding region of PSD-95, we were able to completely abolish  
421 GKAP binding to the PSD-95 GK domain. The GKAP - PSD-95 interaction, however, was not  
422 influenced by ligand binding to PDZ<sub>3</sub>. This result suggests that the canonical GMP-binding  
423 region in the GK domain is *not* allosterically regulated by PDZ<sub>3</sub> ligand binding. For Gnb5 we  
424 observed the opposite pattern: First of all, the R568A mutation had no effect on the Gnb5 -  
425 PSD-95 interaction, enabling us to conclude that Gnb5 occupies different GK domain surfaces  
426 for interaction, indicating that Gnb5 occupies different GK domain surfaces for interaction that  
427 do not overlap with the canonical GMP-binding site responsible for the GKAP interaction.  
428 Second, the Gnb5 - PSD-95 association, unlike the GKAP - PSD-95 interaction, is strongly  
429 dependent on ligand binding to PDZ<sub>3</sub>, further corroborating the idea that Gnb5 binds the  
430 PSD-95 GK domain away from the GMP-binding site.

431 We propose that the Gnb5 - PSD-95 interaction is regulated by a modular allosteric  
432 mechanism: the SH3 domain exerts inhibitory activity on the GK domain binding capacity by  
433 competing directly with Gnb5 for interaction surfaces. The PSD-95 SH3-GK domain tandem  
434 undergoes structural rearrangements upon binding of a PDZ<sub>3</sub> ligand to the adjacent  
435 PDZ<sub>3</sub> domain, and these changes free up the GK domain for interactions with selected  
436 proteins. Via this mechanism, ligand - PDZ<sub>3</sub> domain interactions facilitate formation of both  
437 homotypic and heterotypic complexes guided by the PSD-95 C-terminal PSG domain module.



## 438 **Materials and Methods**

### 439 *DNA Constructs*

440 Full-length rat PSD-95 (NM\_019621) was cloned into pCMV-Tag3A, to obtain MYC-PSD-95.  
441 Arginine 568 was exchanged to Alanine by site-directed mutagenesis to generate MYC-PSD-  
442 95 R568A.

443 PSD-95-YN was generated by a PCR based strategy: amino acids 1 - 723 of PSD-95 were  
444 fused to a flexible 3x(GGGGS) linker followed by amino acids 1 - 154 of EYFP and an HA-tag.  
445 PSD-95-YC was generated accordingly by fusing amino acids 1 - 723 of PSD-95 to a flexible  
446 3x(GGGGS) linker followed by amino acids 155 - 238 of EYFP and a MYC-tag. Leucine 460  
447 was exchanged to Proline by site-directed mutagenesis to generate PSD-95-YN L460P.

448 MYC-PSG was generated by cloning a fragment that encodes amino acids 247 – 724 of PSD-  
449 95 into pCMV-Tag3A. MYC-PSG L460P and MYC-PSG R568A were generated by PCR based  
450 site-directed mutagenesis. FLAG-SH3-GK and FLAG-GK constructs were generated by  
451 cloning fragments that encode amino acids 403 – 724 (SH3-GK) and amino acids 504 - 724  
452 (GK) of PSD-95 into pCMV-Tag2A. MYC-GK was generated by cloning a fragment that  
453 encodes amino acids 504 - 724 of PSD-95 into pCMV-Tag3A.

454 GST-SH3-GK and GST-GK constructs were generated by cloning fragments that encode  
455 amino acids 403 - 724 (SH3-GK) and amino acids 504 - 724 (GK) of PSD-95 into pGEX-6P-1  
456 (GE Healthcare).

457 Full-length rat Neuroligin-1 (NLGN1, NM\_053868.2) was cloned into pcDNA3.1 and an HA-tag  
458 (YPYDVPDYA) was inserted following the signal sequence (between amino acid 45 and 46)  
459 by PCR mutagenesis. The C-terminal PDZ ligand motif (TTRV) was mutated to abolish PDZ  
460 domain binding by introducing two alanine residues (T**ARA**) to generate a mutNLGN1  
461 construct.

462 PDZ ligand constructs were generated by fusing an HSV-tag (QPELAPEDPED) to mCherry  
463 followed by a flexible 3x(GGGGS) linker and 10 aminoacids (DTKNYKQTSV) referring to the  
464 PDZ ligand CRIPT. MutPDZ ligand constructs were generated by mutating the C-terminal  
465 QTSV motif to Q**ASA**.

466 Full-length rat Gnb5 (NM\_031770) was cloned into pCMV-Tag2A to generate FLAG-Gnb5. A  
467 shortGnb5 construct was generated by cloning a fragment that encodes amino acids 34 – 353  
468 of Gnb5 into pCMV-Tag2A. Gnb5-Clover was generated by cloning Gnb5 into pEYFP-N1. In a  
469 subsequent cloning step EYFP was exchanged for Clover. Full-length mouse Gkap  
470 (NM\_001360665) was cloned into pCMV-Tag2A to generate FLAG-mGkap.

471 *Cell Culture and Transfection*

472  
473 COS-7 and HEK-293T cells were maintained in DMEM containing 10% FCS, PEN-STREP  
474 (1,000 U/ml) and 2 mM L-glutamine. Cells were transfected with Lipofectamine 2000 Reagent  
475 (Invitrogen) according to the manufacturer's protocol and harvested for subsequent  
476 experimental procedures 20–24 hours post transfection.

477

478 *Bimolecular fluorescence complementation (BiFC) assay and flow cytometry*

479 HEK-293T cells were cultured in 12 well plates and transfected with the respective expression  
480 construct combinations. Prior to analysis by flow cytometry (BD FACS Calibur) the cells were  
481 incubated for 60 minutes at room temperature to promote fluorophore formation. Cells were  
482 harvested by gently washing the culture dishes with PBS / 10% FCS. 10,000 single-cell events  
483 for each construct combination were measured and fluorescence was quantified (BD  
484 CellQuest).

485

486 *Coimmunoprecipitation*

487 Transfected COS-7 cells were harvested 20–24 hours post transfection, resuspended in lysis  
488 buffer (50 mM Tris-HCl, 100 mM NaCl, 0.1% NP40, pH 7.5 / 1 ml per T75 flask) and lysed  
489 using a 30-gauge syringe needle. Lysates (1 ml) were cleared by centrifugation and incubated  
490 with 2 mg of the appropriate antibody (mouse  $\alpha$ GFP antibody [Roche], mouse  $\alpha$ MYC  
491 [Clontech], or normal mouse IgG [Santa Cruz]) for 3 hours followed by a centrifugation at  
492 20,000 x g. Supernatants were incubated with 30  $\mu$ l Protein G-Agarose (Roche) per ml and  
493 washed three times with lysis buffer.

494

495 *Western Blot*

496 Immunocomplexes were collected by centrifugation, boiled in SDS sample buffer, and  
497 separated by 10% Tricine-SDS-PAGE (Schagger, 2006). Proteins were blotted onto a PVDF  
498 membrane (0.2 mm pore size, Bio-Rad) by semidry transfer (SEMI-DRY TRANSFER CELL,  
499 Bio-Rad). Membranes were blocked (PBS / 0.1% Tween 20 / 5% dry milk) and incubated  
500 overnight with the primary antibody (1:5000). After incubation with the respective horseradish  
501 peroxidase (HRP)-conjugated secondary antibody (1:5000), blots were imaged using  
502 chemiluminescence HRP substrate (Western Lightning Plus ECL, Perkin Elmer) and a  
503 luminescent image analyzer (ImageQuant LAS 4000 mini, GE Healthcare). The following  
504 primary antibodies were used for protein detection:  $\alpha$ FLAG M2-HRP (mouse, A8592, Sigma),  
505  $\alpha$ Gnb5 (rabbit, ab185206, Abcam),  $\alpha$ MYC (rabbit, 2272S, Cell Signalling). Secondary

506 antibodies:  $\alpha$ Mouse-HRP (115-035-003, Dianova),  $\alpha$ Rabbit-HRP (111-035-003, Dianova). All  
507 western blots shown are representative results from individual pull-down experiments that  
508 have been replicated at least three times with similar outcome.

509

#### 510 *Isolation of crude synaptosomes and GST pull-down*

511 One rat brain (Wistar, 2g) was used to isolate synaptic proteins with Syn-PER reagent (Thermo  
512 Scientific) according to the manufacturer's manual. The purified synaptosome pellet was  
513 solubilised in 10ml PBS / 1% Triton X-100 and cleared by centrifugation.

514 GST-GK and GST-SH3-GK constructs were expressed in *E.coli* BL21 DE3 and purified  
515 according to the manufacturer's manual (GST Gene Fusion System, GE Healthcare). 30 $\mu$ l of  
516 Glutathione Agarose (Pierce) was loaded with GST-GK or GST-SH3-GK proteins and  
517 incubated for 3 hours with solubilised synaptic proteins. The beads were washed three times  
518 with PBS / 1% Triton X-100 and further processed for SDS-PAGE.

519

#### 520 *Sample preparation and liquid chromatography-mass spectrometry (LC-MS)*

521 Proteins were eluted from the matrix by incubation with SDS sample buffer for 5 min at 95 °C  
522 and subsequently separated by SDS-PAGE (10% Tricine-SDS-PAGE). Coomassie-stained  
523 lanes were cut into 12 slices and in-gel protein digestion and  $^{16}\text{O}/^{18}\text{O}$ -labeling was performed  
524 as described (Kristiansen et al., 2008; Lange et al., 2010). In brief, corresponding samples  
525 were incubated overnight at 37 °C with 50 ng trypsin (sequencing grade modified, Promega)  
526 in 25  $\mu$ L of 50 mM ammonium bicarbonate in the presence of heavy water (Campro Scientific  
527 GmbH, 97%  $^{18}\text{O}$ ) and regular  $^{16}\text{O}$ -water, respectively. To prevent oxygen back-exchange by  
528 residual trypsin activity, samples were heated at 95 °C for 20 min. After cooling down, 50  $\mu$ L  
529 of 0.5% TFA in acetonitrile was added to decrease the pH of the sample from ~8 to ~2.  
530 Afterwards, corresponding heavy- and light-isotope samples were combined and peptides  
531 were dried under vacuum. Peptides were reconstituted in 10  $\mu$ L of 0.05% (v/v) TFA, 2% (v/v)  
532 acetonitrile and 6.5  $\mu$ L were analyzed by a reversed-phase capillary nano liquid  
533 chromatography system (Ultimate 3000, Thermo Scientific) connected to an Orbitrap Velos  
534 mass spectrometer (Thermo Scientific). Samples were injected and concentrated on a trap  
535 column (PepMap100 C18, 3  $\mu$ m, 100 Å, 75  $\mu$ m i.d.  $\times$  2 cm, Thermo Scientific) equilibrated with  
536 0.05% TFA, 2% acetonitrile in water. After switching the trap column inline, LC separations  
537 were performed on a capillary column (Acclaim PepMap100 C18, 2  $\mu$ m, 100 Å, 75  $\mu$ m i.d.  $\times$   
538 25 cm, Thermo Scientific) at an eluent flow rate of 300 nL/min. Mobile phase A contained 0.1%  
539 formic acid in water, and mobile phase B contained 0.1% formic acid in acetonitrile. The column  
540 was pre-equilibrated with 3 % mobile phase B followed by an increase of 3–50% mobile phase  
541 B in 50 min. Mass spectra were acquired in a data-dependent mode utilizing a single MS

542 survey scan (m/z 350-1500) with a resolution of 60,000 in the Orbitrap, and MS/MS scans of  
543 the 20 most intense precursor ions in the linear trap quadrupole. The dynamic exclusion time  
544 was set to 60 s and automatic gain control was set to  $1 \times 10^6$  and 5.000 for Orbitrap-MS and  
545 LTQ-MS/MS scans, respectively.

546

#### 547 *Proteomic Data Analysis*

548 Identification and quantification of  $^{16}\text{O}/^{18}\text{O}$ -labeled samples was performed using the Mascot  
549 Distiller Quantitation Toolbox (version 2.6.3.0, Matrix Science). Data were compared to the  
550 SwissProt protein database using the taxonomy *rattus* (August 2017 release with 7996 protein  
551 sequences). A maximum of two missed cleavages was allowed and the mass tolerance of  
552 precursor and sequence ions was set to 10 ppm and 0.35 Da, respectively. Methionine  
553 oxidation, acetylation (protein N-terminus), propionamide (C), and C-terminal  $^{18}\text{O}_1$ - and  $^{18}\text{O}_2$ -  
554 isotope labeling were used as variable modifications. A significance threshold of 0.05 was used  
555 based on decoy database searches. For quantification at protein level, a minimum of two  
556 quantified peptides was set as a threshold. Relative protein ratios were calculated from the  
557 intensity-weighted average of all peptide ratios. The median protein ratio of each experiment  
558 was used for normalization of protein ratios. Only proteins that were quantified in all three  
559 replicates with a standard deviation of  $< 2$  were considered. Mean protein L/H ratios (GST-GK  
560 /GST-SH3-GK) from all three replicates were calculated. Known contaminants (e.g. keratins)  
561 and the bait protein were removed from the protein output table.

562

#### 563 *Live cell microscopy*

564 HEK-293T cells were seeded in 35 mm FluoroDishes (World Precision Instruments) and triple-  
565 transfected with PSD-95-YN, PSD-95-YC and Neuroligin-1 expression constructs. Images  
566 were acquired using a spinning disk confocal microscope (Nikon CSU-X).

567

#### 568 *Immunofluorescence and confocal microscopy*

569 Mixed cultures of primary hippocampal neurons were generated as reported earlier  
570 (Rademacher et al., 2016). Briefly, E18 Wistar pups were decapitated, and hippocampi were  
571 isolated and collected in ice-cold DMEM (Lonza). Single cell solution was generated by partially  
572 digestion (5 min at 37 °C) with Trypsin/EDTA (Lonza). The reaction was stopped by adding  
573 DMEM/10% FBS (Biochrom) following a subsequent washing with DMEM. Tissue was then

574 resuspended in neuron culture medium (Neurobasal supplemented with B27 and 500  $\mu$  M  
575 glutamine) and mechanically dissociated. Neurons were plated at  $\sim$ 105 cells/cm<sup>2</sup> on coverslips  
576 coated with poly-D-Lysine and Laminin (Sigma). One hour after plating, cell debris was  
577 removed and cultures were maintained in a humidified incubator at 37 °C with 5% CO<sub>2</sub>. The  
578 hippocampal neurons were fixed at DIV21 with 4% PFA in PBS for 10 min at RT and  
579 permeabilised with 0.2% Triton-X in PBS for 5 min. After blocking for 1 h at RT with blocking  
580 solution (4% BSA in PBS) the primary antibodies were incubated overnight at 4°C diluted 1:500  
581 in blocking solution. Secondary antibodies were diluted 1:1000 in blocking solution and  
582 incubated for 1 hour at RT. Coverslips were mounted with Fluoromount G and images were  
583 acquired with a Leica laser-scanning confocal microscope (Leica TCS-SP5 II, 63x objective).  
584 Primary antibodies:  $\alpha$ Gnb5 (rabbit, ab185206, Abcam),  $\alpha$ PSD-95 (mouse, 75-028, NeuroMab),  
585  $\alpha$ MAP2 (mouse, 05-346, Millipore),  $\alpha$ MAP2 (guinea pig, 188004, Synaptic Systems),  
586  $\alpha$ Synapsin (guinea pig, 106004, Synaptic Systems). Secondary antibodies:  $\alpha$ Rabbit Alexa  
587 Fluor 488 (A-21441, Invitrogen),  $\alpha$ Guinea pig Alexa Fluor 568 (Thermo Fisher),  $\alpha$ Guinea pig  
588 Alexa Fluor 405 (ab175678, Abcam),  $\alpha$ Mouse Alexa Fluor 568 (A-11031, Life Technologies),  
589  $\alpha$ Mouse Alexa Fluor 405 (A-31553, Invitrogen).

590

### 591 *Laboratory animal handling*

592 All animals used were handled in accordance with the relevant guidelines and regulations.  
593 Protocols were approved by the 'Landesamt für Gesundheit und Soziales' (LaGeSo; Regional  
594 Office for Health and Social Affairs) in Berlin and animals reported under the permit number  
595 T0280/10.

596

### 597 **Author Contributions**

598 N.R., B.K. and S.-A.K. performed experiments. N.R., C.F., M.C.W. and S.A.S. designed  
599 experiments and analysed data, N.R. and S.A.S. wrote the paper.

600

### 601 **Acknowledgments**

602 We would like to thank Bettina Schmerl and Hanna Zieger for helpful comments and support,  
603 the Advanced Medical Bioimaging Core Facility – Excellence Center for Microscopy at the  
604 Charité Berlin for support with spinning disk microscopy imaging. This work was funded by the  
605 DFG (SH 650/2, Collaborative Research Centres SFB 958 / SFB 665 and Excellence Cluster  
606 NeuroCure EXC257).

607 **Competing interests**

608 The authors declare no competing interests.

609

610 **References**

- 611 Araki Y, Zeng M, Zhang M, Huganir RL (2015) Rapid dispersion of SynGAP from synaptic spines  
612 triggers AMPA receptor insertion and spine enlargement during LTP. *Neuron* 85:173-189.
- 613 Cheever ML, Snyder JT, Gershburg S, Siderovski DP, Harden TK, Sondek J (2008) Crystal structure of  
614 the multifunctional Gbeta5-RGS9 complex. *Nat Struct Mol Biol* 15:155-162.
- 615 Chen X, Levy JM, Hou A, Winters C, Azzam R, Sousa AA, Leapman RD, Nicoll RA, Reese TS (2015) PSD-  
616 95 family MAGUKs are essential for anchoring AMPA and NMDA receptor complexes at the  
617 postsynaptic density. *Proc Natl Acad Sci U S A* 112:E6983-6992.
- 618 Dakoji S, Tomita S, Karimzadegan S, Nicoll RA, Brecht DS (2003) Interaction of transmembrane AMPA  
619 receptor regulatory proteins with multiple membrane associated guanylate kinases.  
620 *Neuropharmacology* 45:849-856.
- 621 Ehrlich I, Malinow R (2004) Postsynaptic density 95 controls AMPA receptor incorporation during  
622 long-term potentiation and experience-driven synaptic plasticity. *J Neurosci* 24:916-927.
- 623 Ehrlich I, Klein M, Rumpel S, Malinow R (2007) PSD-95 is required for activity-driven synapse  
624 stabilization. *Proc Natl Acad Sci U S A* 104:4176-4181.
- 625 El-Husseini Ael D, Schnell E, Dakoji S, Sweeney N, Zhou Q, Prange O, Gauthier-Campbell C, Aguilera-  
626 Moreno A, Nicoll RA, Brecht DS (2002) Synaptic strength regulated by palmitate cycling on  
627 PSD-95. *Cell* 108:849-863.
- 628 Fossati G, Morini R, Corradini I, Antonucci F, Trepte P, Edry E, Sharma V, Papale A, Pozzi D, Defilippi P,  
629 Meier JC, Brambilla R, Turco E, Rosenblum K, Wanker EE, Ziv NE, Menna E, Matteoli M (2015)  
630 Reduced SNAP-25 increases PSD-95 mobility and impairs spine morphogenesis. *Cell Death*  
631 *Differ* 22:1425-1436.
- 632 Fukata Y, Dimitrov A, Boncompain G, Vielemeyer O, Perez F, Fukata M (2013) Local palmitoylation  
633 cycles define activity-regulated postsynaptic subdomains. *J Cell Biol* 202:145-161.
- 634 Funke L, Dakoji S, Brecht DS (2005) Membrane-associated guanylate kinases regulate adhesion and  
635 plasticity at cell junctions. *Annu Rev Biochem* 74:219-245.
- 636 Irie M, Hata Y, Takeuchi M, Ichtchenko K, Toyoda A, Hirao K, Takai Y, Rosahl TW, Sudhof TC (1997)  
637 Binding of neuroligins to PSD-95. *Science* 277:1511-1515.
- 638 Johnston CA, Whitney DS, Volkman BF, Doe CQ, Prehoda KE (2011) Conversion of the enzyme  
639 guanylate kinase into a mitotic-spindle orienting protein by a single mutation that inhibits  
640 GMP-induced closing. *Proc Natl Acad Sci U S A* 108:E973-978.
- 641 Kim E, Naisbitt S, Hsueh YP, Rao A, Rothschild A, Craig AM, Sheng M (1997) GKAP, a novel synaptic  
642 protein that interacts with the guanylate kinase-like domain of the PSD-95/SAP90 family of  
643 channel clustering molecules. *J Cell Biol* 136:669-678.
- 644 Kornau HC, Schenker LT, Kennedy MB, Seeburg PH (1995) Domain interaction between NMDA  
645 receptor subunits and the postsynaptic density protein PSD-95. *Science* 269:1737-1740.
- 646 Kristiansen TZ, Harsha HC, Gronborg M, Maitra A, Pandey A (2008) Differential membrane  
647 proteomics using 18O-labeling to identify biomarkers for cholangiocarcinoma. *J Proteome*  
648 *Res* 7:4670-4677.
- 649 Lam AJ, St-Pierre F, Gong Y, Marshall JD, Cranfill PJ, Baird MA, McKeown MR, Wiedenmann J,  
650 Davidson MW, Schnitzer MJ, Tsien RY, Lin MZ (2012) Improving FRET dynamic range with  
651 bright green and red fluorescent proteins. *Nat Methods* 9:1005-1012.
- 652 Lange S, Sylvester M, Schumann M, Freund C, Krause E (2010) Identification of phosphorylation-  
653 dependent interaction partners of the adapter protein ADAP using quantitative mass  
654 spectrometry: SILAC vs (18)O-labeling. *J Proteome Res* 9:4113-4122.

- 655 Lautz JD, Brown EA, VanSchoiack AAW, Smith SEP (2018) Synaptic activity induces input-specific  
656 rearrangements in a targeted synaptic protein interaction network. *J Neurochem*.
- 657 Leonard AS, Davare MA, Horne MC, Garner CC, Hell JW (1998) SAP97 is associated with the alpha-  
658 amino-3-hydroxy-5-methylisoxazole-4-propionic acid receptor GluR1 subunit. *J Biol Chem*  
659 273:19518-19524.
- 660 Li J, Wilkinson B, Clementel VA, Hou J, O'Dell TJ, Coba MP (2016) Long-term potentiation modulates  
661 synaptic phosphorylation networks and reshapes the structure of the postsynaptic  
662 interactome. *Sci Signal* 9:rs8.
- 663 Lisman JE, Raghavachari S, Tsien RW (2007) The sequence of events that underlie quantal  
664 transmission at central glutamatergic synapses. *Nat Rev Neurosci* 8:597-609.
- 665 Lodder EM et al. (2016) GNB5 Mutations Cause an Autosomal-Recessive Multisystem Syndrome with  
666 Sinus Bradycardia and Cognitive Disability. *Am J Hum Genet* 99:786.
- 667 Marcette J, Hood IV, Johnston CA, Doe CQ, Prehoda KE (2009) Allosteric control of regulated  
668 scaffolding in membrane-associated guanylate kinases. *Biochemistry* 48:10014-10019.
- 669 McGee AW, Brecht DS (1999) Identification of an intramolecular interaction between the SH3 and  
670 guanylate kinase domains of PSD-95. *J Biol Chem* 274:17431-17436.
- 671 McGee AW, Dakoiji SR, Olsen O, Brecht DS, Lim WA, Prehoda KE (2001) Structure of the SH3-guanylate  
672 kinase module from PSD-95 suggests a mechanism for regulated assembly of MAGUK  
673 scaffolding proteins. *Mol Cell* 8:1291-1301.
- 674 Niethammer M, Valtschanoff JG, Kapoor TM, Allison DW, Weinberg RJ, Craig AM, Sheng M (1998)  
675 CRIPT, a novel postsynaptic protein that binds to the third PDZ domain of PSD-95/SAP90.  
676 *Neuron* 20:693-707.
- 677 Nishiyama J, Yasuda R (2015) Biochemical Computation for Spine Structural Plasticity. *Neuron* 87:63-  
678 75.
- 679 Opazo P, Sainlos M, Choquet D (2012) Regulation of AMPA receptor surface diffusion by PSD-95 slots.  
680 *Curr Opin Neurobiol* 22:453-460.
- 681 Opazo P, Labrecque S, Tigaret CM, Frouin A, Wiseman PW, De Koninck P, Choquet D (2010) CaMKII  
682 triggers the diffusional trapping of surface AMPARs through phosphorylation of stargazin.  
683 *Neuron* 67:239-252.
- 684 Ostrovskaya O, Xie K, Masuho I, Fajardo-Serrano A, Lujan R, Wickman K, Martemyanov KA (2014)  
685 RGS7/Gbeta5/R7BP complex regulates synaptic plasticity and memory by modulating  
686 hippocampal GABABR-GIRK signaling. *Elife* 3:e02053.
- 687 Rademacher N, Kunde SA, Kalscheuer VM, Shoichet SA (2013) Synaptic MAGUK multimer formation  
688 is mediated by PDZ domains and promoted by ligand binding. *Chem Biol* 20:1044-1054.
- 689 Rademacher N, Schmerl B, Lardong JA, Wahl MC, Shoichet SA (2016) MPP2 is a postsynaptic MAGUK  
690 scaffold protein that links SynCAM1 cell adhesion molecules to core components of the  
691 postsynaptic density. *6:35283*.
- 692 Reese ML, Dakoiji S, Brecht DS, Dotsch V (2007) The guanylate kinase domain of the MAGUK PSD-95  
693 binds dynamically to a conserved motif in MAP1a. *Nat Struct Mol Biol* 14:155-163.
- 694 Schagger H (2006) Tricine-SDS-PAGE. *Nat Protoc* 1:16-22.
- 695 Schwenk J, Harmel N, Brechet A, Zolles G, Berkefeld H, Muller CS, Bildl W, Baehrens D, Huber B, Kulik  
696 A, Klocker N, Schulte U, Fakler B (2012) High-resolution proteomics unravel architecture and  
697 molecular diversity of native AMPA receptor complexes. *Neuron* 74:621-633.
- 698 Sheng M, Hoogenraad CC (2007) The postsynaptic architecture of excitatory synapses: a more  
699 quantitative view. *Annu Rev Biochem* 76:823-847.
- 700 Sheng N, Bemben MA, Diaz-Alonso J, Tao W, Shi YS, Nicoll RA (2018) LTP requires postsynaptic PDZ-  
701 domain interactions with glutamate receptor/auxiliary protein complexes. *Proc Natl Acad Sci*  
702 U S A 115:3948-3953.
- 703 Shin H, Hsueh YP, Yang FC, Kim E, Sheng M (2000) An intramolecular interaction between Src  
704 homology 3 domain and guanylate kinase-like domain required for channel clustering by  
705 postsynaptic density-95/SAP90. *J Neurosci* 20:3580-3587.

- 706 Sumioka A, Yan D, Tomita S (2010) TARP phosphorylation regulates synaptic AMPA receptors through  
707 lipid bilayers. *Neuron* 66:755-767.
- 708 Takeuchi M, Hata Y, Hirao K, Toyoda A, Irie M, Takai Y (1997) SAPAPs. A family of PSD-95/SAP90-  
709 associated proteins localized at postsynaptic density. *J Biol Chem* 272:11943-11951.
- 710 Tavares GA, Panepucci EH, Brunger AT (2001) Structural characterization of the intramolecular  
711 interaction between the SH3 and guanylate kinase domains of PSD-95. *Mol Cell* 8:1313-1325.
- 712 Watson AJ, Katz A, Simon MI (1994) A fifth member of the mammalian G-protein beta-subunit family.  
713 Expression in brain and activation of the beta 2 isotype of phospholipase C. *J Biol Chem*  
714 269:22150-22156.
- 715 Wilkinson B, Li J, Coba MP (2017) Synaptic GAP and GEF Complexes Cluster Proteins Essential for GTP  
716 Signaling. *Sci Rep* 7:5272.
- 717 Wu Q, DiBona VL, Bernard LP, Zhang H (2012) The polarity protein partitioning-defective 1 (PAR-1)  
718 regulates dendritic spine morphogenesis through phosphorylating postsynaptic density  
719 protein 95 (PSD-95). *J Biol Chem* 287:30781-30788.
- 720 Xie K, Allen KL, Kourrich S, Colon-Saez J, Thomas MJ, Wickman K, Martemyanov KA (2010) Gbeta5  
721 recruits R7 RGS proteins to GIRK channels to regulate the timing of neuronal inhibitory  
722 signaling. *Nat Neurosci* 13:661-663.
- 723 Ye F, Zeng M, Zhang M (2018) Mechanisms of MAGUK-mediated cellular junctional complex  
724 organization. *Curr Opin Struct Biol* 48:6-15.
- 725 Yokoi N, Fukata M, Fukata Y (2012) Synaptic plasticity regulated by protein-protein interactions and  
726 posttranslational modifications. *Int Rev Cell Mol Biol* 297:1-43.
- 727 Zeng M, Ye F, Xu J, Zhang M (2017) PDZ Ligand Binding-Induced Conformational Coupling of the PDZ-  
728 SH3-GK Tandems in PSD-95 Family MAGUKs. *J Mol Biol*.
- 729 Zeng M, Shang Y, Araki Y, Guo T, Haganir RL, Zhang M (2016) Phase Transition in Postsynaptic  
730 Densities Underlies Formation of Synaptic Complexes and Synaptic Plasticity. *Cell* 166:1163-  
731 1175 e1112.
- 732 Zhang J, Lewis SM, Kuhlman B, Lee AL (2013) Supertertiary structure of the MAGUK core from PSD-  
733 95. *Structure* 21:402-413.
- 734 Zhu J, Shang Y, Zhang M (2016a) Mechanistic basis of MAGUK-organized complexes in synaptic  
735 development and signalling. *Nat Rev Neurosci* 17:209-223.
- 736 Zhu J, Shang Y, Xia Y, Zhang R, Zhang M (2016b) An Atypical MAGUK GK Target Recognition Mode  
737 Revealed by the Interaction between DLG and KIF13B. *Structure* 24:1876-1885.
- 738 Zhu J, Shang Y, Xia C, Wang W, Wen W, Zhang M (2011) Guanylate kinase domains of the MAGUK  
739 family scaffold proteins as specific phospho-protein-binding modules. *EMBO J* 30:4986-4997.
- 740 Zhu J, Zhou Q, Shang Y, Li H, Peng M, Ke X, Weng Z, Zhang R, Huang X, Li SSC, Feng G, Lu Y, Zhang M  
741 (2017) Synaptic Targeting and Function of SAPAPs Mediated by Phosphorylation-Dependent  
742 Binding to PSD-95 MAGUKs. *Cell Rep* 21:3781-3793.

743



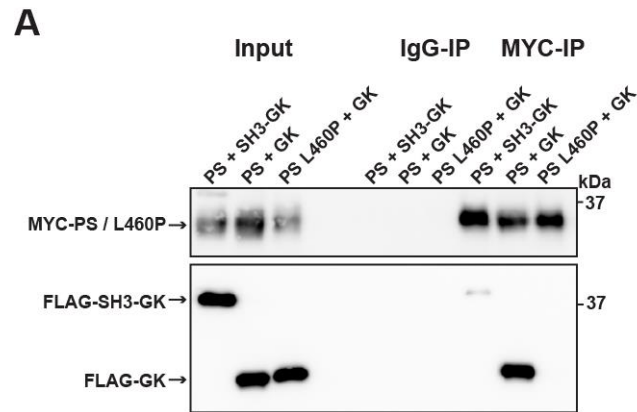

744

745 **Supplemental Figure 1**

746 **A)** PSD-95 constructs consisting of the PDZ3-SH3 domains (PS) were coexpressed together  
747 with either an SH3-GK domain construct, or a GK domain construct. As a comparison PDZ3-  
748 SH3 L460P was coexpressed with a GK domain construct and PDZ3 SH3 / PDZ3-SH3 L460P  
749 constructs were precipitated and copurified proteins were identified by western blot. By  
750 mutating the leucine 460 to proline this efficient protein complex formation is disrupted. By  
751 exchanging the internal L460 residue the SH3 domain loses its ability to bind to the GK domain  
752 construct in trans.
